# Supplementary material for: Postmortem Metabolomics Reveal Acylcarnitines as Potential Biomarkers for Fatal Oxycodone-Related Intoxication
Source: MDPI journal article supplement (doi:10.3390/metabo12020109), 2022-01-25
Supplement: s1 [file s1]

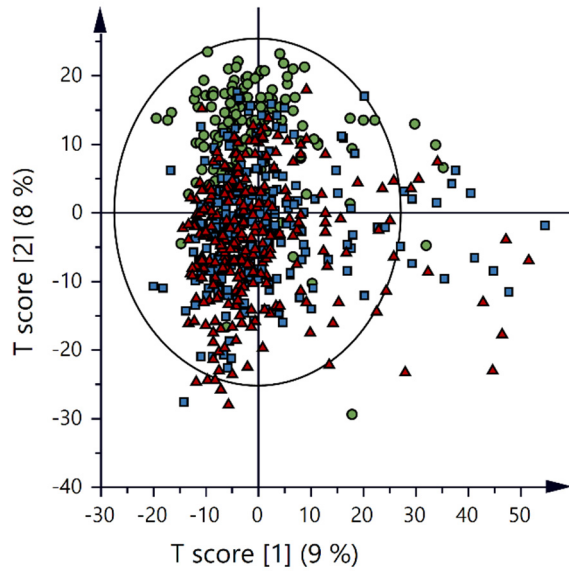

**Figure S1. PCA score plot.** Oxycodone intoxications ( $n=249$ ,  $\blacktriangle$ ), positive controls ( $n=244$ ,  $\blacksquare$ ) and negative controls ( $n=132$ ,  $\bullet$ ) ( $R^2 = 0.61$ ,  $Q^2 = 0.54$ ).

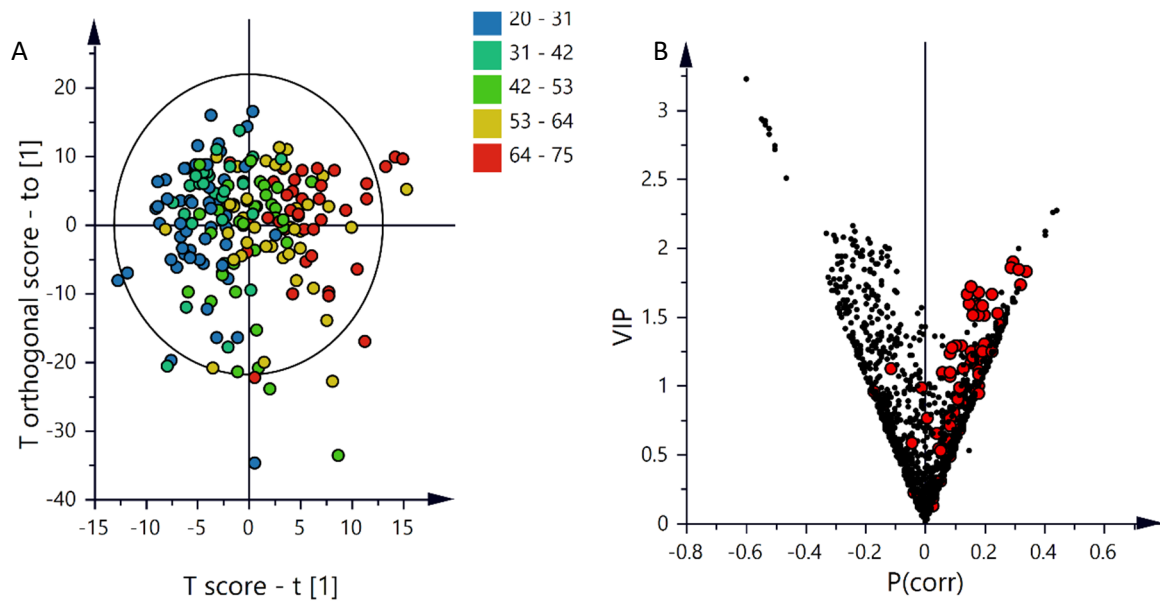

**Figure S2. Age based OPLS model.** Figure A is a color coded scoreplot illustrating age related correlations (blue=20-31 years, turquoise=31-42 years, green=42-53 years, yellow=53-64 years, red=64-75 years). The model is based on all autopsy cases from the negative controls ( $n=195$ ). Figure B is a corresponding volcano plot, illustrating how acylcarnitines (red circles) impact and correlates with age. Some acylcarnitine has a positive correlation, however the model impact and the correlation is poor ( $p(\text{corr}) < 0.2$ ,  $VIP < 1.5$ ), in comparison to acylcarnitines correlation to intoxication. For comparison see Figure 2, Figures S3, S4 and S5.

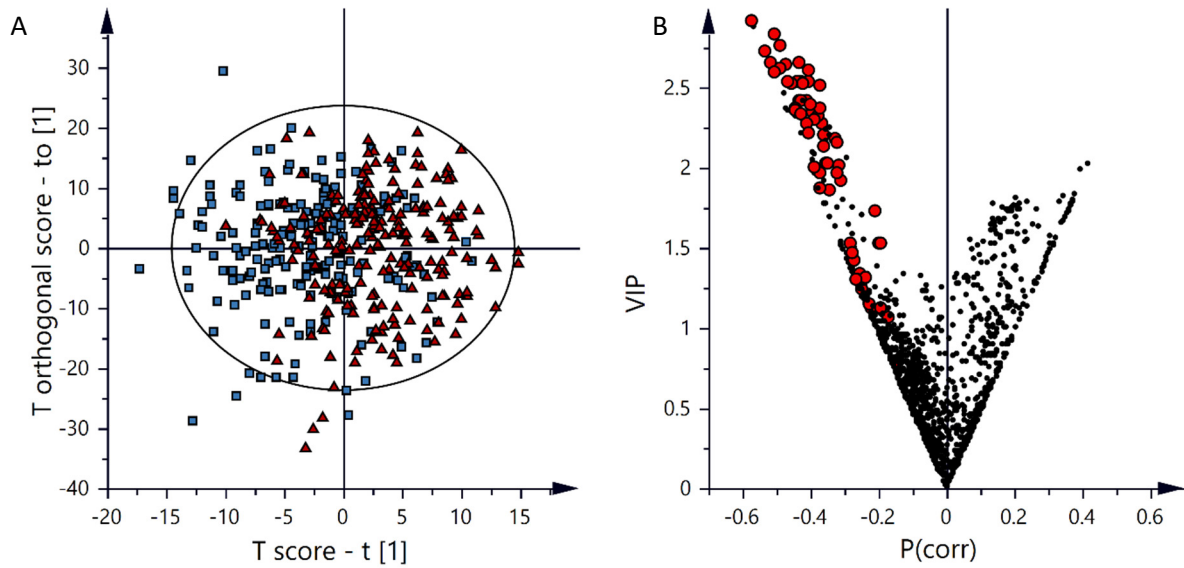

**Figure S3. Age-matched OPLS-DA model.** In the age matched OPLS-DA score plot (A), a trend in group separation on a population level is still observed between oxycodone intoxications ( $n = 207$ , mean age = 56,  $\blacktriangle$ ) and the positive controls ( $n = 192$ , mean age = 56,  $\blacksquare$ ). In addition, a volcano plot (B) illustrates that acylcarnitines (red circles) are of high importance for the trend in group separation, where a majority has a  $p(\text{corr}) < -0.2$  and  $\text{VIP} > 1.5$  ( $R^2 = 0.28$ ,  $Q^2 = 0.12$ ).

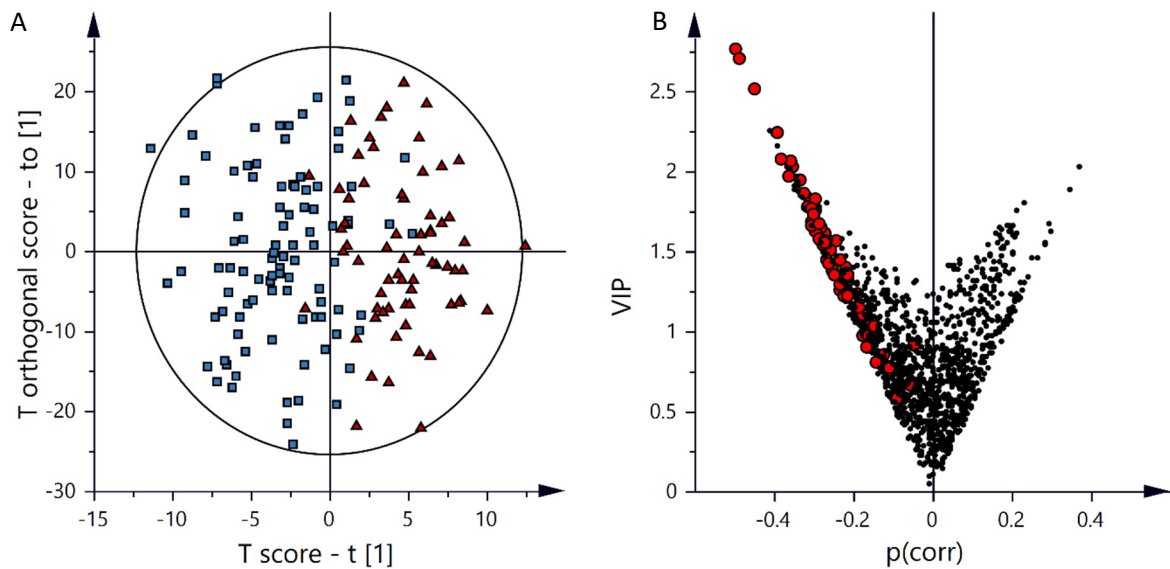

**Figure S4. Age and PMI-matched OPLS-DA model.** In the age and PMI matched OPLS-DA score plot (A), a stronger trend in group separation on a population level is observed between oxycodone intoxications ( $n = 66$ ,  $\blacktriangle$ ) and the positive controls ( $n = 96$ ,  $\blacksquare$ ). In addition, a volcano plot (B) illustrates that acylcarnitines (red circles) still are of high importance for the trend in group separation, where a majority has a  $p(\text{corr}) < -0.2$  and  $\text{VIP} > 1.5$ . Mean age and mean PMI were comparable between the groups ( $p = 0.72$  and  $0.35$  respectively). Sensitivity and specificity for the model were above 90 % however the  $Q^2$  were low ( $R^2 = 0.61$ ,  $Q^2 = 0.08$ ).

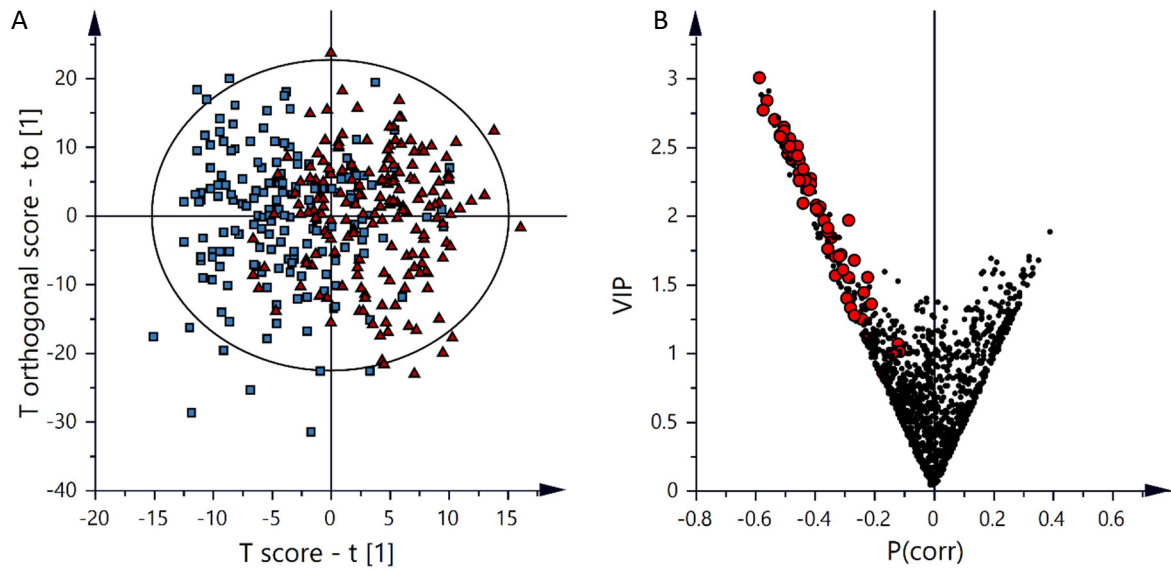

**Figure S5. Modified OPLS-DA model with regard to decomposition.** Overview of OPLS-DA model without autopsy cases with tendency of decomposition. In the OPLS-DA score plot (A), a similar trend in group separation on a population level is observed between oxycodone intoxications ( $\blacktriangle$ ) and the positive controls ( $\blacksquare$ ) in comparison to the model including the whole training set (Figure 1). In addition, a volcano plot (B) illustrates that acylcarnitines (red circles) are of high importance for group separation, where a majority has a  $p(\text{corr}) < -0.2$  and  $VIP > 1.5$  ( $R^2 = 0.42$ ,  $Q^2 = 0.26$ ).

**Table S1.** Demographic overview of detected CNS-depressant drugs in the three study groups.

| Analyte <sup>1</sup>    | Intoxications<br>(n=376) | Positive Controls<br>(n=364) | Negative Controls<br>(n=207) |
|-------------------------|--------------------------|------------------------------|------------------------------|
| Negative drug screening | 0%                       | 0%                           | 42%                          |
| Ethanol                 | 30%                      | 16%                          | 36%                          |
| Alprazolam              | 26%                      | 10%                          | 5%                           |
| Buprenorphine           | 4%                       | 1%                           | 1%                           |
| Buspirone               | 1%                       | 0%                           | 1%                           |
| Clomethiazole           | 0%                       | 0%                           | 0%                           |
| Clonazepam              | 3%                       | 1%                           | 0%                           |
| Clozapine               | 1%                       | 0%                           | 0%                           |
| Dexmedetomidine         | 1%                       | 1%                           | 0%                           |
| Diazepam                | 26%                      | 9%                           | 7%                           |
| Fentanyl                | 4%                       | 10%                          | 0%                           |
| Haloperidol             | 1%                       | 2%                           | 1%                           |
| Hydromorphone           | 0%                       | 0%                           | 0%                           |
| Hydroxyzine             | 5%                       | 4%                           | 2%                           |
| Ketobemidone            | 1%                       | 0%                           | 0%                           |
| Levomepromazine         | 3%                       | 1%                           | 1%                           |
| Lithium                 | 0%                       | 0%                           | 0%                           |
| Lorazepam               | 1%                       | 1%                           | 0%                           |
| Methadone               | 5%                       | 1%                           | 0%                           |
| Midazolam               | 1%                       | 4%                           | 0%                           |
| Morphine                | 11%                      | 9%                           | 1%                           |
| Nitrazepam              | 1%                       | 1%                           | 1%                           |
| Olanzapine              | 3%                       | 2%                           | 6%                           |
| Oxazepam                | 13%                      | 9%                           | 5%                           |
| Oxycodone               | 100%                     | 100%                         | 0%                           |
| Propiomazine            | 7%                       | 2%                           | 1%                           |
| Risperidone             | 1%                       | 1%                           | 1%                           |
| Tapentadol              | 1%                       | 0%                           | 0%                           |
| Tramadol                | 9%                       | 4%                           | 1%                           |
| Zolpidem                | 11%                      | 5%                           | 1%                           |
| Zopiclone               | 29%                      | 20%                          | 7%                           |

**Table S2.** Cause of Death and Analytical Findings for False positives and False neagiteves ( $t > 5$  or  $t < -5$ ).

| Classified as Control predicted as Intoxication | Primary Cause of Death    | Secondary Cause of Death                                          | Positive analytes                                                                                                                                                                                                |
|-------------------------------------------------|---------------------------|-------------------------------------------------------------------|------------------------------------------------------------------------------------------------------------------------------------------------------------------------------------------------------------------|
| Positive Control 1                              | Old myocardial infarction | Alcohol dependence syndrome                                       | 0,01 µg/g alprazolam<br>0,5 µg/g oxycodone<br>2,5 µg/g venlafaxine<br>11 µg/g lamotrigine<br>0,37 µg/g O-desmethylvenlafaxine<br>0,36 µg/g mirtazapine<br>0,03 µg/g desmethylmirtazapine<br>0,08 µg/g duloxetine |
| Positive Control 2                              | Hanging                   | Poisoning by other and unspecified drugs and medicinal substances | 0,24 µg/g alprazolam                                                                                                                                                                                             |

|                    |                                                                   |                 |                                                                                                                                                                                                                                                                                                                                                                           |
|--------------------|-------------------------------------------------------------------|-----------------|---------------------------------------------------------------------------------------------------------------------------------------------------------------------------------------------------------------------------------------------------------------------------------------------------------------------------------------------------------------------------|
|                    |                                                                   |                 | 0,34 µg/g Amphetamine<br>0,25 µg/g diazepam<br>0,12 µg/g nordazepam<br>9,3 µg/g ketamine<br>0,18 µg/g 7-amino-clonazepam<br>0,54 µg/g MDMA<br>0,05 µg/g oxazepam<br>7,1 µg/g oxycodone<br>0,6 µg/g propranolol<br>0,04 µg/g temazepam<br>0,06 µg/g zopiclone<br>0,03 µg/g zolpidem<br>0,67 ‰ ethanol i lårblod<br>0,45 µg/g norfludiazepam<br>55 ng/g Cyclopropylfentanyl |
| Positive Control 3 | Ill-defined descriptions<br>and complications of<br>heart disease | Drug dependence | 0,39 µg/g alimemazine<br>0,13 µg/g desmethylalimemazine<br>0,02 µg/g alprazolam<br>0,5 µg/g oxycodone<br>1,2 µg/g venlafaxine<br>0,16 µg/g O-desmethylvenlafaxine<br>6,4 µg/g pregabalin<br>0,13 ‰ ethanol i lårblod                                                                                                                                                      |
| Positive Control 4 | Hanging                                                           |                 | 0,83 µg/g citalopram<br>0,27 µg/g desmethylcitalopram<br>0,08 µg/g diazepam<br>0,14 µg/g nordazepam<br>0,5 µg/g oxycodone<br>0,05 µg/g propiomazine<br>0,19 µg/g dihydropropiomazine<br>0,03 µg/g zopiclone<br>7,5 µg/g tramadol<br>1,2 µg/g O-desmethyltramadol<br>11 µg/g pregabalin<br>0,20 µg/g amlodipine<br>0,07 µg/g melatonin                                     |
| Positive Control 5 | Toxic effect of carbon<br>monoxide                                |                 | 0,33 µg/g diazepam<br>0,06 µg/g nordazepam<br>47 % carboxyhemoglobin<br>0,24 µg/g oxazepam                                                                                                                                                                                                                                                                                |

0,03 µg/g oxycodone  
4,4 µg/g lamotrigine  
0,68 µg/g bupropion  
0,54 µg/g duloxetine  
0,27 µg/g hydroxybupropion  
1,26 ‰ ethanol

| <b>Classified as Intoxication, Predicted as Positive Control</b> | <b>Primary Cause of Death</b>                                                              | <b>Secondary Cause of Death</b>       | <b>Positive analytes</b>                                                                                                                                                                                     |
|------------------------------------------------------------------|--------------------------------------------------------------------------------------------|---------------------------------------|--------------------------------------------------------------------------------------------------------------------------------------------------------------------------------------------------------------|
| Inoxication 6                                                    | Toxic effect of alcohol                                                                    | Diseases of esophagus                 | 0,006 µg/g oxycodone<br>3,69 ‰ ethanol                                                                                                                                                                       |
| Inoxication 7                                                    | Poisoning by other and unspecified drugs and medicinal substances (Multiple organ failure) |                                       | 8,9 µg/g furosemide<br><br>0,01 µg/g codeine<br>0,05 µg/g midazolam<br>0,08 µg/g oxycodone<br>54 µg/g acetaminophen                                                                                          |
| Inoxication 8                                                    | Poisoning by other and unspecified drugs and medicinal substances                          |                                       | 0,07 µg/g 7-amino-clonazepam<br><br>0,0023 µg/g clonidine<br>0,03 µg/g midazolam<br>0,14 µg/g morphine<br>0,07 µg/g oxazepam<br>0,006 µg/g oxycodone<br>14 µg/g acetaminophen<br>0,0003 µg/g dexmedetomidine |
| Inoxication 9                                                    | Poisoning by other and unspecified drugs and medicinal substances                          |                                       | 0,48 µg/g amphetamine<br><br>0,80 µg/g citalopram<br>0,05 µg/g desmethylcitalopram<br>0,3 µg/g oxycodone<br>67 µg/g acetaminophen<br>0,55 µg/g cetirizine<br>2,7 µg/g pregabalin                             |
| Inoxication 10                                                   | Poisoning by other and unspecified drugs and medicinal substances                          | Chronic obstructive pulmonary disease | 0,36 µg/g alimemazine<br><br>0,07 µg/g desmethylalimemazine<br>0,82 µg/g citalopram                                                                                                                          |

|                |                                                                   |                                               |                                                                                                                                                                                                                                                                                                                                              |
|----------------|-------------------------------------------------------------------|-----------------------------------------------|----------------------------------------------------------------------------------------------------------------------------------------------------------------------------------------------------------------------------------------------------------------------------------------------------------------------------------------------|
|                |                                                                   |                                               | 0,06 µg/g desmethylocitalopram<br>0,009 µg/g clonazepam<br>0,23 µg/g 7-amino-clonazepam<br>0,12 µg/g oxycodone<br>17 µg/g acetaminophen<br>0,06 µg/g dihydropropiomazine<br>0,03 µg/g zolpidem<br>14 µg/g gabapentin                                                                                                                         |
| Inoxication 11 | Poisoning by other and unspecified drugs and medicinal substances | Other forms of chronic ischemic heart disease | 0,15 µg/g alimemazine<br><br>0,13 µg/g desmethylalimemazine<br>0,02 µg/g oxycodone<br>0,53 µg/g zopiclone                                                                                                                                                                                                                                    |
| Inoxication 12 | Poisoning by other and unspecified drugs and medicinal substances |                                               | 0,28 µg/g citalopram<br><br>0,15 µg/g desmethylocitalopram<br>0,07 µg/g diazepam<br>0,07 µg/g nordazepam<br>11 ng/g fentanyl<br>0,01 µg/g oxycodone<br>0,15 µg/g dihydropropiomazine<br>1,7 µg/g trimetoprim<br>0,19 µg/g quetiapine<br>0,05 µg/g zolpidem<br>0,21 µg/g mirtazapine<br>0,09 µg/g desmethyalmirtazapine<br>25 µg/g gabapentin |

**Table S3.** Demographic overview of training set and validations set for study cohort.

|                                      | <u>Oxycodone intoxications</u> |               | <u>Positive Controls</u> |               | <u>Negative Controls</u> |               |
|--------------------------------------|--------------------------------|---------------|--------------------------|---------------|--------------------------|---------------|
|                                      | Training                       | Validation    | Training                 | Validation    | Training                 | Validation    |
| n                                    | 249                            | 126           | 244                      | 120           | 132                      | 63            |
| Females/males                        | 116/133                        | 44/82         | 77/167                   | 46/74         | 29/103                   | 15/48         |
| Age (yrs)                            | 48 (36-62)                     | 46 (34-57)    | 64 (52-72)               | 67 (57-77)    | 49 (30-60)               | 45 (29-56)    |
| Body weight (kg)                     | 85 (71-99)                     | 87 (73-104)   | 76 (62-92)               | 74 (62-91)    | 73 (65-83)               | 74 (62-91)    |
| Body Height (cm)                     | 173 (165-181)                  | 174 (166-182) | 173 (165-180)            | 172 (166-179) | 175 (170-180)            | 172 (166-179) |
| Body Mass Index (kg/m <sup>2</sup> ) | 29 (25-33)                     | 29 (25-34)    | 26 (22-30)               | 25 (22-29)    | 24 (22-27)               | 25 (22-29)    |
